# Supplementary material for: Vaccine Hesitancy during the Coronavirus Pandemic in South Tyrol, Italy: Linguistic Correlates in a Representative Cross-Sectional Survey
Source: MDPI journal article supplement (doi:10.3390/vaccines10101584), 2022-09-21
Supplement: s1 [file s1]

**Table S1.** SARS-CoV-2 vaccination rates (percent of population) in Italian regions and provinces on January 17, 2022<sup>1</sup>.

| Italian Region          | First Dose <sup>2</sup> (%) | Full (%) | Booster (%) |
|-------------------------|-----------------------------|----------|-------------|
| Abruzzo                 | 78.7                        | 73.8     | 44.7        |
| Basilicata              | 79.8                        | 73.6     | 43.9        |
| Bolzano                 | 74.2                        | 67.0     | 41.3        |
| Calabria                | 76.5                        | 68.6     | 41.1        |
| Campania                | 76.3                        | 69.6     | 42.7        |
| Emilia-Romagna          | 80.4                        | 74.6     | 45.6        |
| Friuli – Venezia Giulia | 76.9                        | 71.4     | 39.8        |
| Lazio                   | 80.7                        | 72.0     | 48.1        |
| Liguria                 | 79.6                        | 74.4     | 40.9        |
| Lombardia               | 81.9                        | 75.2     | 48.2        |
| Marche                  | 77.1                        | 72.2     | 44.3        |
| Molise                  | 81.5                        | 75.0     | 46.5        |
| Piemonte                | 78.1                        | 72.4     | 45.8        |
| Puglia                  | 81.6                        | 74.2     | 48.6        |
| Sardegna                | 80.5                        | 75.7     | 41.0        |
| Sicilia                 | 75.1                        | 67.9     | 35.4        |
| Trento                  | 79.2                        | 73.0     | 45.4        |
| Toscana                 | 82.4                        | 76.7     | 44.2        |
| Umbria                  | 79.8                        | 74.0     | 46.6        |
| Valle D’Aosta           | 75.6                        | 70.5     | 49.2        |
| Veneto                  | 78.2                        | 72.7     | 46.5        |

<sup>1</sup> Coronavirus, le vaccinazioni in Italia regione per regione (<https://lab.gedidigital.it/gedi-visual/2021/report-vaccini-anti-covid-aggiornamento-vaccinazioni-italia/>).

<sup>2</sup> Including single dose vaccine

**Table 2.** SARS-CoV-2 vaccination rates (percent of population) in neighboring countries to Italy of Central Europe on January 13, 2022<sup>1</sup>.

| Country     | First Dose (%) | Full (%) | Booster (%) |
|-------------|----------------|----------|-------------|
| Slovenia    | 59.8           | 57.1     | 24.9        |
| Austria     | 74.8           | 74.2     | 44.7        |
| Switzerland | 69.6           | 68.0     | 32.4        |
| France      | 79.1           | 74.9     | 40.9        |
| Italy       | 82.5           | 75.9     | 41.9        |

<sup>1</sup> Our World in Data (<https://ourworldindata.org/covid-vaccinations>).
